# Supplementary material for: Mdivi-1 Protects CD4+ T Cells against Apoptosis via Balancing Mitochondrial Fusion-Fission and Preventing the Induction of Endoplasmic Reticulum Stress in Sepsis
Source: Hindawi journal article supplement (doi:10.1155/2019/7329131), 2019-05-16
Supplement: f1 [file 7329131.f1.pdf]

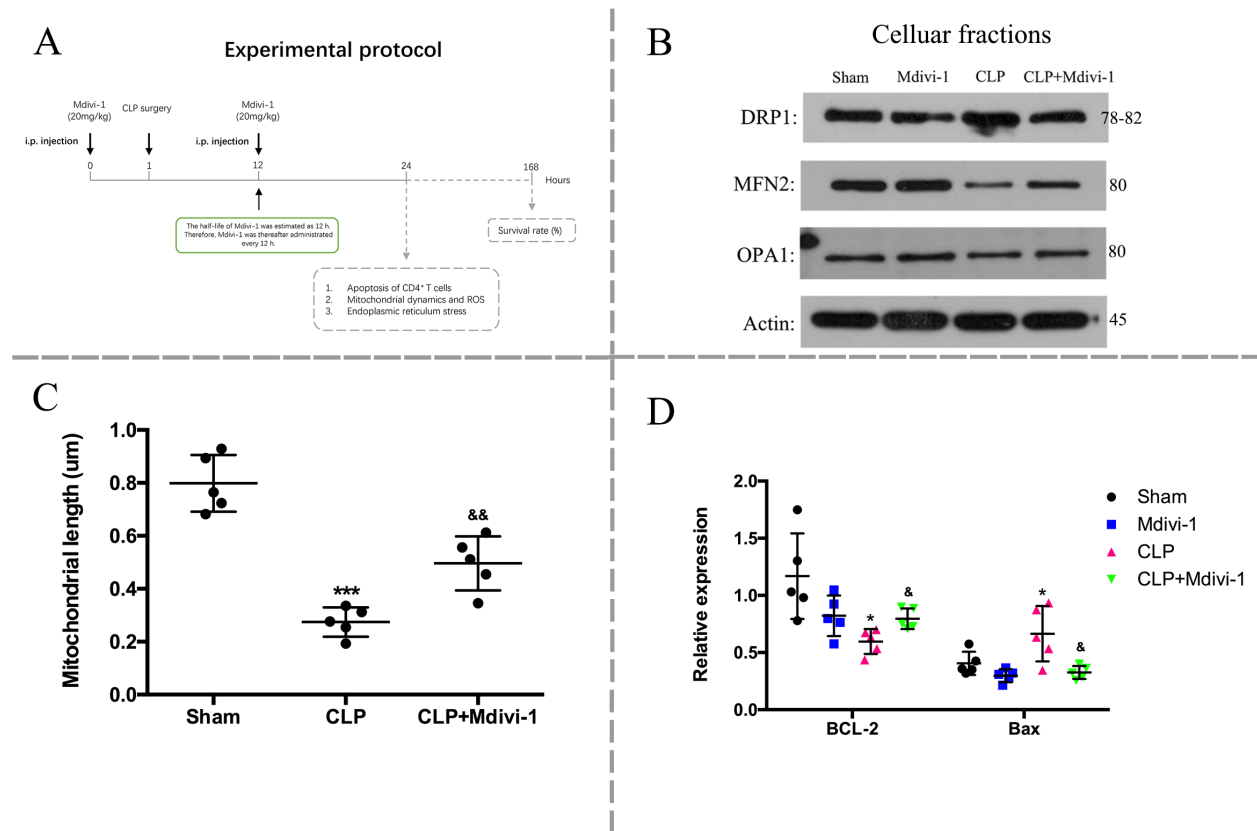

**Figure S1.** (A) The experimental protocol is related to Figure 1 and schematic panel illustrates the study design; (B) Western blot assay of MFN2, OPA1 p-Drp1 and Drp1 expression in total homogenate; (C) Micrographs of mitochondria observed using a transmission electron microscopy in Figure 2C and quantitative analysis of average mitochondrial length in **five CD4<sup>+</sup>T cells**; (D) quantitative analysis of BCL-2 and Bax. The results are shown as the mean  $\pm$  SD, n=5. \*(P< 0.05) vs the sham group, \*\*\*(P< 0.001); &(P< 0.05) vs the CLP group, &&(P< 0.01).

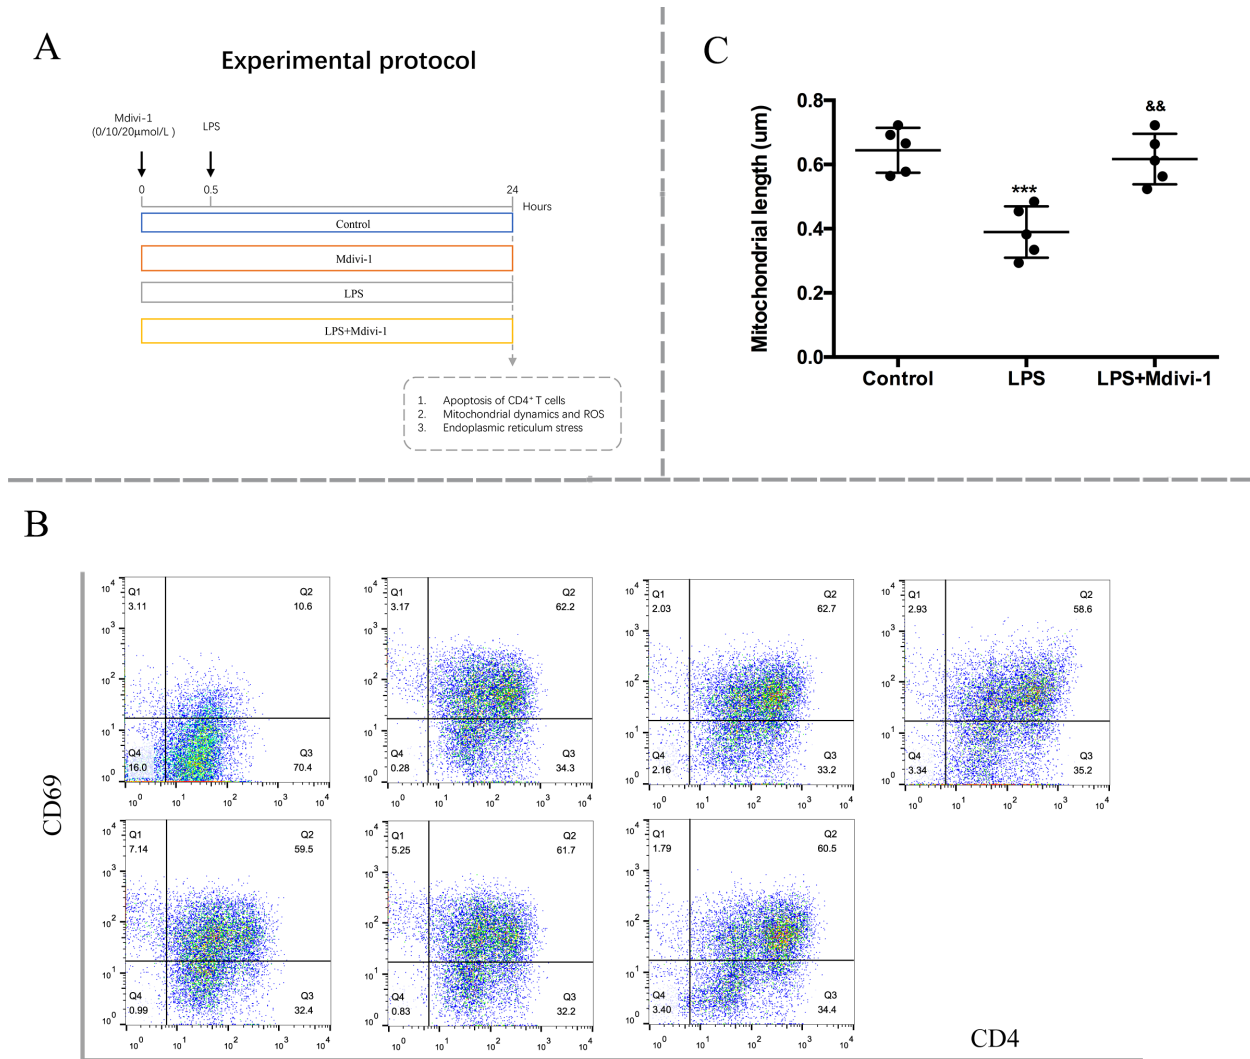

**Figure S2.** (A) The experimental protocol is related to Figure 4 and schematic panel illustrates the study design; (B) Expression levels of CD4 and CD69 by flow cytometric analysis in CD4<sup>+</sup>T cells; (C) Micrographs of mitochondria observed using a transmission electron microscopy in Figure 6A and quantitative analysis of average mitochondrial length in five CD4<sup>+</sup>T cells. The results are shown as the mean ± SD, n=5. \*\*\* (P < 0.001) vs the sham group; && (P < 0.01) vs the CLP group.

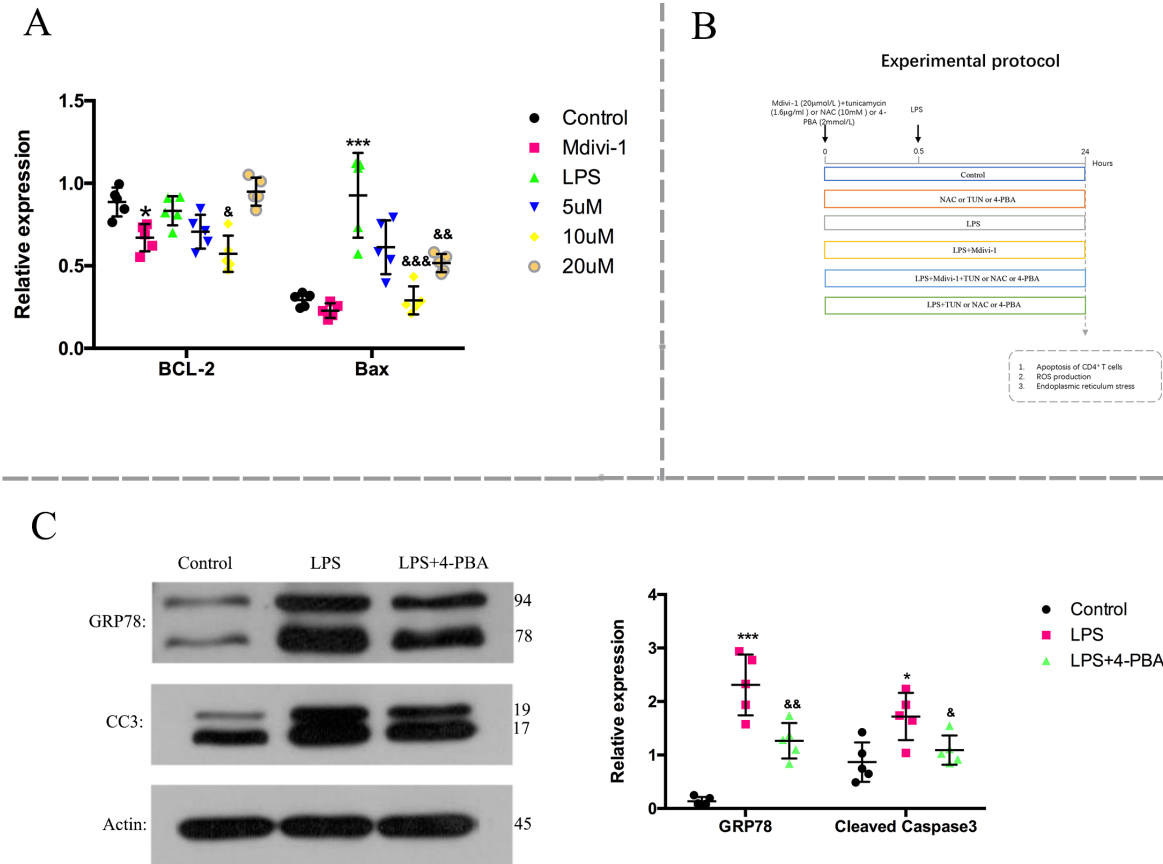

**Figure S3.** (A) quantitative analysis of BCL-2 and Bax; (B) The experimental protocol is related to Figure 8, 9 and schematic panel illustrates the study design; (C) Western blot assay and quantitative analysis of GRP78 and CC3 expression. The results are shown as the mean  $\pm$  SD,  $n=5$ . \*( $P < 0.05$ ) vs the Control group, \*\*\*( $P < 0.001$ ); &( $P < 0.05$ ) vs the CLP group, &&( $P < 0.01$ ), &&& ( $P < 0.001$ ).
